# Supplementary material
Source: publisher figshare collection journal article supplement (https://tandf.figshare.com/articles/dataset/_/3826998)
Supplement: Supplementary file 2 [file 2]

## Taxonomic Discussion

Of the several dozen nominal species of Pleistocene *Equus* published from North America, only a few are represented by sufficiently complete and abundant craniodental and postcranial elements to confidently ascertain their validity. Of this subset, five morphospecies are contemporaneous with the Paisley Caves fauna:

- 1.) A large species with stout metapodials, protocones with a moderate to strong anterior heel and a broad lingual groove, ectoflexids that reach the molar isthmus but do not penetrate it (except in some cases of advanced wear), linguaeflexids that are generally more “U”-shaped than “V” shaped, although this varies, and infundibula in the lower incisors (closed in i1-2, commonly open in i3). Following Savage (1951), Winans (1985), and Scott (2004), this morph is herein assigned to the species *Equus scotti* Gidley, 1900. Samples for this species were obtained from Fossil Lake and Silver Lake, Oregon, US. Horses from these localities have elsewhere been assigned to *E. pacificus* Leidy, 1868 (Elftman, 1931; Hu, 2009), but the nondiagnostic nature of the holotype of this species renders it a *nomen dubium* (after Savage, 1951; Winans, 1985).
- 2.) A large species with stout metapodials, protocones with a moderate to strong anterior heel and a broad lingual groove, ectoflexids that reach the molar isthmus but do not penetrate it (except in some cases of advanced wear), linguaeflexids that are generally more “U”-shaped than “V” shaped, although this varies, and no infundibula in the lower incisors. Following Merriam (1913), this morph is herein assigned to the species *Equus occidentalis* Leidy, 1865. Samples for this species were obtained from Rancho La Brea, California, US. Previous studies have challenged the validity of *E. occidentalis* (e.g.,

Miller, 1971; Winans, 1985), but it is accepted here *sensu* Merriam (1913), following Scott (2004).

- 3.) A small species with stout metapodials, protocones with a moderate anterior heel and a long posterior projection, short ectoflexids that do not reach the molar isthmus, linguaflexids that are generally more “V”-shaped than “U” shaped, although this varies, and infundibula in the lower incisors (closed in i1-2, commonly open in i3). These fossils have been assigned to *Equus lambei* Hay, 1917 (e.g. Harington and Clulow, 1973). Although recent molecular studies have suggested strong genetic congruity with extant caballines (*E. ferus* Boddaert, 1785, and *E. caballus* Linnaeus, 1758), for consistency and ease of reference we continue refer to these fossils here as *E. lambei*.
- 4.) A small species with stout metapodials, protocones with a moderate anterior heel and a long posterior projection, short ectoflexids that do not reach the molar isthmus, linguaflexids that are generally more “V”-shaped than “U” shaped, although this varies, and no infundibula in the lower incisors. Fossils exhibiting this morphology have previously been assigned to *Equus conversidens* Owen, 1869 by multiple researchers (e.g., Stock, 1950; Hibbard, 1955; Harris and Porter, 1980; Azzaroli, 1992, 1998; Dalquest and Schultz, 1992). The validity of this species has been challenged on the basis that the holotype specimen is not diagnostic (e.g., Winans, 1985). But as noted by Scott (2004), that holotype was one of many named prior to the presently accepted strict codification of zoological naming procedures. Numerous species names proposed in the late 1800s and early 1900s for Pleistocene horses are based on insufficiently diagnostic material, yet many of these names continue to be employed because they are acknowledged to refer to a distinctive morphotype. To reject these names, although

perhaps technically advisable, would result in considerable taxonomic confusion and instability. The nomen *Equus conversidens* is maintained primarily because it has a long history of use and promotes taxonomic stability.

- 5.) A small species with elongate or “stilt-legged” metapodials, protocones with a moderate anterior heel and a long posterior projection, short ectoflexids that do not reach the molar isthmus, linguaeflexids that are broadly “V”-shaped than “U” shaped, although this varies, and infundibula in the lower incisors (closed in i1-2, commonly open in i3). Among the potentially available species names for small stilt-legged horses in North America, the only well supported taxon is *Equus francisci* Hay, 1915 (see Lundelius and Stevens, 1970). Unfortunately, the holotype of this species differs from the diagnosis above in lacking infundibula in the lower incisors. Although it is possible that this lack reflects either regional differentiation or ontogenetic wear, we prefer not to employ the name for the horses under study here. Lacking any other available names, we follow Weinstock et al. 2005 and later authors, and refer to this group as NWSL (New World Stilt Legged) horses.

It is acknowledged that there are likely additional valid Pleistocene species of *Equus* in North America. However, these other species are either older than the late Pleistocene – the age of the Paisley Cave deposits – or else are represented by insufficient postcranial specimens to warrant inclusion and/or are of uncertain taxonomic validity.

## References

- Azzaroli, A. 1992. The present status of knowledge on the Ecuatorian species of the genus *Equus*. Bollettino della Società Paleontologica Italiana 31(1): 133-139.
- Azzaroli, A. 1998. The genus *Equus* in North America: the Pleistocene species. Palaeontographia Italica 85: 1-60.
- Boddaert, P. 1785. Elenchus animalium, volumen 1: Sistens quadrupedia huc usque nota, erorumque varietates. C. R. Hake, Rotterdam, 174 pp.
- Dalquest, W.W. and G.E. Schultz, 1992. Ice age animals of northwestern Texas. Wichita Falls: Midwestern State University Press. 309 p.
- Elftman, H.O., 1931. Pleistocene mammals of Fossil Lake, Oregon. American Museum of Natural History Novitates 481: 1-21.
- Gidley, J.W. 1900. A new species of Pleistocene horse from the staked plains of Texas. Bulletin of the American Museum of Natural History 12: 111-116.
- Harington, C.R. and F.V. Clulow. 1973. Pleistocene mammals from Gold Run Creek, Yukon Territory. Canadian Journal of Earth Sciences 10(5): 697-759.
- Harris, A.H. and L.S.W. Porter. 1980. Late Pleistocene horses of Dry Cave, Eddy County, New Mexico. Journal of Mammalogy 61(1): 46-65.
- Hay, O.P., 1915. Contributions to the knowledge of the mammals of the Pleistocene of North America. Proceedings of the United States National Museum XLVIII: 515-575.
- Hay, O.P., 1917. Description of a new species of extinct horse, *Equus lambei*, from the Pleistocene of Yukon Territory. Proceedings of the United States National Museum 53:435-443.

- Hibbard, C.W. 1955. Pleistocene vertebrates from the Upper Becerra (Becerra Superior) formation, Valley of Tequixquiac, Mexico, with notes on other Pleistocene forms. Contributions from the Museum of Paleontology, University of Michigan 12(5):47-96.
- Hu, H.-P. 2009. The Equidae from the Pleistocene Fossil Lake area in Oregon and their Comparison with the Blancan equids from the Pacific Northwest." Ph.D. dissertation, South Dakota School of Mines and Technology, Rapid City, 2009.
- Leidy, J. 1865. Bones and teeth of horses from California and Oregon. Proceedings of the Academy of Natural Sciences of Philadelphia 1865:94.
- Leidy, J. 1868. Notice of some remains of Horses. Proceedings of the Academy of Natural Sciences of Philadelphia 1868: 195.
- Linnaeus, C. 1758. Systema naturae, per regna tria naturae, secundum classes, ordines, genera, species cum characteribus, differentiis synonymis, locus. Editio decima. Salvii, Holmiae 1:1–824.
- Lundelius, E.L. Jr. and M.S. Stevens, 1970. *Equus francisci*, a small stilt-legged horse, middle Pleistocene of Texas. Journal of Paleontology 44: 148-153.
- Merriam, J.C., 1913. Preliminary report on the horses of Rancho La Brea. University of California Publications Bulletin of the Department of Geology 7(21):397-418.
- Miller, W.E. 1971. Pleistocene vertebrates of the Los Angeles Basin and vicinity (exclusive of Rancho La Brea). Bull. L. A. Co. Mus. Nat. Hist. Sci. 10:1-124.
- Owen, R., 1869. On fossil teeth of equines from Central and South America. Proceedings of the Royal Society of London XVII: 267-268.
- Savage, D.E., 1951. Late Cenozoic vertebrates of the San Francisco Bay region. University of California Bulletin of the Department of Geological Sciences 28:215-314.

Scott, E. 2004. Pliocene and Pleistocene horses from Porcupine Cave. Biodiversity Response to Environmental Change in the Middle Pleistocene: The Porcupine Cave Fauna from Colorado (A.D. Barnosky, ed.). Berkeley: University of California Press, p. 264-279.

Stock, C. 1950. 25,000 year old horse: the skeleton of an Ice Age horse makes a return trip to Mexico. Engineering and Science Monthly 14: 16-17.

Weinstock, J., E. Willerslev, A. Sher, W. Tong, S.Y.W. Ho, D. Rubenstein, J. Storer, J. Burns, L. Martin, C. Bravi, A. Prieto, D. Froese, E. Scott, L. Xulong, and A. Cooper. 2005. Evolution, systematics, and phylogeography of Pleistocene horses in the New World: a molecular perspective. PloS Biology 3(8):e241.

Winans, M.C. 1985. Revision of North American fossil species of the genus *Equus* (Mammalia: Perissodactyla: Equidae). PhD dissertation, University of Texas, Austin, Texas, 264 pp.
